# Supplementary material
Source: MDPI journal article supplement (https://www.mdpi.com/1999-4907/14/6/1259)
Supplement: s1 [file s1]

Table S2 Results of calibration and validation sets using SVM

|                                                       | Calibration Set |          |             |             | Validation Set |             |             |
|-------------------------------------------------------|-----------------|----------|-------------|-------------|----------------|-------------|-------------|
|                                                       | Range (nm)      | Accuracy | Sensitivity | Specificity | Accuracy       | Sensitivity | Specificity |
|                                                       |                 | (%)      | (%)         | (%)         | (%)            | (%)         | (%)         |
| <i>Pterocarpus soyauxii</i>                           | 400 ~800        | 98.3     | 98.3        | 99.6        | 100            | 100         | 98.9        |
|                                                       | 800 ~2500       | 100      | 100         | 100         | 100            | 100         | 100         |
|                                                       | 400 ~2500       | 100      | 100         | 100         | 100            | 100         | 100         |
| <i>Pterocarpus tinctorius</i> var. <i>chrysothris</i> | 400 ~800        | 93.3     | 93.3        | 100         | 90             | 90          | 100         |
|                                                       | 800 ~2500       | 100      | 100         | 99.6        | 100            | 100         | 99.4        |
|                                                       | 400 ~2500       | 98.3     | 98.3        | 100         | 100            | 100         | 100         |
| <i>Pterocarpus santalinus</i>                         | 400 ~800        | 85       | 85          | 98.5        | 85             | 85          | 98.3        |
|                                                       | 800 ~2500       | 100      | 100         | 100         | 100            | 100         | 100         |
|                                                       | 400 ~2500       | 100      | 100         | 100         | 100            | 100         | 100         |
| <i>Pterocarpus erinaceus</i>                          | 400 ~800        | 90       | 90          | 98.3        | 80             | 80          | 98.3        |
|                                                       | 800 ~2500       | 100      | 100         | 100         | 100            | 100         | 100         |
|                                                       | 400 ~2500       | 100      | 100         | 100         | 100            | 100         | 100         |
| <i>Pterocarpus indicus</i>                            | 400 ~800        | 100      | 100         | 99.8        | 95             | 95          | 100         |
|                                                       | 800 ~2500       | 96.7     | 96.7        | 100         | 95             | 95          | 100         |
|                                                       | 400 ~2500       | 100      | 100         | 99.8        | 95             | 95          | 100         |
| <i>Pterocarpus macrocarpus</i>                        | 400 ~800        | 98.3     | 98.3        | 100         | 95             | 95          | 99.4        |
|                                                       | 800 ~2500       | 100      | 100         | 100         | 100            | 100         | 100         |
|                                                       | 400 ~2500       | 100      | 100         | 100         | 100            | 100         | 99.4        |
| <i>Dalbergia louvelii</i>                             | 400 ~800        | 100      | 100         | 100         | 100            | 100         | 100         |
|                                                       | 800 ~2500       | 100      | 100         | 100         | 100            | 100         | 100         |
|                                                       | 400 ~2500       | 100      | 100         | 100         | 100            | 100         | 100         |
| <i>Dalbergia melanoxydon</i>                          | 400 ~800        | 100      | 100         | 100         | 100            | 100         | 100         |
|                                                       | 800 ~2500       | 100      | 100         | 100         | 100            | 100         | 100         |
|                                                       | 400 ~2500       | 100      | 100         | 100         | 100            | 100         | 100         |
| <i>Pterocarpus tinctorius</i>                         | 400 ~800        | 98.3     | 98.3        | 99.8        | 100            | 100         | 100         |
|                                                       | 800 ~2500       | 100      | 100         | 100         | 100            | 100         | 100         |
|                                                       | 400 ~2500       | 100      | 100         | 100         | 100            | 100         | 100         |
| <i>Pterocarpus angolensis</i>                         | 400 ~800        | 100      | 100         | 99.8        | 100            | 100         | 98.9        |
|                                                       | 800 ~2500       | 100      | 100         | 100         | 100            | 100         | 100         |
|                                                       | 400 ~2500       | 100      | 100         | 100         | 100            | 100         | 100         |
