# Supplementary material
Source: MDPI journal article supplement (https://www.mdpi.com/1999-4907/14/6/1259)
Supplement: s1 [file s1]

Table S1 Results of calibration and validation sets using PLS-DA

|                                                       | Calibration Set |          |             |             | Validation Set |             |             |
|-------------------------------------------------------|-----------------|----------|-------------|-------------|----------------|-------------|-------------|
|                                                       | Range (nm)      | Accuracy | Sensitivity | Specificity | Accuracy       | Sensitivity | Specificity |
|                                                       |                 | (%)      | (%)         | (%)         | (%)            | (%)         | (%)         |
| <i>Pterocarpus soyauxii</i>                           | 400 ~800        | 61.7     | 86.7        | 91.1        | 55             | 90          | 91.7        |
|                                                       | 800 ~2500       | 88.3     | 100         | 92.2        | 95             | 95          | 91.1        |
|                                                       | 400 ~2500       | 85       | 96.7        | 89.4        | 95             | 95          | 90.6        |
| <i>Pterocarpus tinctorius</i> var. <i>chrysothris</i> | 400 ~800        | 90       | 93.3        | 96.3        | 80             | 85          | 95.6        |
|                                                       | 800 ~2500       | 100      | 98.3        | 98.9        | 95             | 95          | 98.9        |
|                                                       | 400 ~2500       | 95       | 98.3        | 97.6        | 100            | 100         | 98.3        |
| <i>Pterocarpus santalinus</i>                         | 400 ~800        | 95       | 96.7        | 96.3        | 90             | 95          | 95.6        |
|                                                       | 800 ~2500       | 100      | 100         | 99.8        | 100            | 100         | 99.4        |
|                                                       | 400 ~2500       | 100      | 100         | 99.8        | 100            | 100         | 100         |
| <i>Pterocarpus erinaceus</i>                          | 400 ~800        | 76.7     | 71.7        | 80.6        | 60             | 80          | 82.2        |
|                                                       | 800 ~2500       | 100      | 100         | 100         | 100            | 100         | 100         |
|                                                       | 400 ~2500       | 100      | 98.3        | 94.8        | 100            | 100         | 95          |
| <i>Pterocarpus indicus</i>                            | 400 ~800        | 96.7     | 96.7        | 98.9        | 100            | 100         | 100         |
|                                                       | 800 ~2500       | 98.3     | 100         | 97.8        | 100            | 100         | 98.9        |
|                                                       | 400 ~2500       | 93.3     | 98.3        | 96.9        | 100            | 100         | 97.2        |
| <i>Pterocarpus macrocarpus</i>                        | 400 ~800        | 96.7     | 98.3        | 97.2        | 100            | 100         | 97.8        |
|                                                       | 800 ~2500       | 98.3     | 93.3        | 99.3        | 90             | 90          | 100         |
|                                                       | 400 ~2500       | 100      | 100         | 89.1        | 95             | 95          | 87.2        |
| <i>Dalbergia louvelii</i>                             | 400 ~800        | 90       | 91.7        | 98.1        | 100            | 100         | 97.2        |
|                                                       | 800 ~2500       | 100      | 100         | 100         | 100            | 100         | 100         |
|                                                       | 400 ~2500       | 71.7     | 100         | 93.1        | 80             | 100         | 91.7        |
| <i>Dalbergia melanoxydon</i>                          | 400 ~800        | 100      | 100         | 100         | 100            | 100         | 100         |
|                                                       | 800 ~2500       | 100      | 100         | 99.3        | 100            | 100         | 98.9        |
|                                                       | 400 ~2500       | 100      | 100         | 99.8        | 100            | 100         | 99.4        |
| <i>Pterocarpus tinctorius</i>                         | 400 ~800        | 88.3     | 95          | 93.9        | 80             | 95          | 92.8        |
|                                                       | 800 ~2500       | 81.7     | 83.3        | 94.1        | 85             | 85          | 93.9        |
|                                                       | 400 ~2500       | 61.7     | 95          | 86.3        | 70             | 95          | 87.2        |
| <i>Pterocarpus angolensis</i>                         | 400 ~800        | 85       | 90          | 95.7        | 80             | 80          | 95.6        |
|                                                       | 800 ~2500       | 100      | 100         | 99.6        | 100            | 100         | 100         |
|                                                       | 400 ~2500       | 96.7     | 96.7        | 99.6        | 100            | 100         | 99.4        |
